# Supplementary material for: Multi-aspect simulation insight on thermolysis mechanism and interaction of NTO/HMX-based plastic-bonded explosives: a new conception of the mixed explosive model
Source: Royal Society of Chemistry journal article supplement (doi:10.1039/d3cp00494e), 2023-01-01
Supplement: d3cp00494e1.pdf [file d3cp00494e1.pdf]

**Multi-aspect Simulation insight on Thermolysis Mechanism and Interaction of  
NTO/HMX Based Plastic Bonded Explosives: New conception of mixed explosive model**

Xiaofeng Yuan, Ying Huang, Shuhai Zhang, Ruijun Gou, Shuangfei Zhu, Qianjin Guo

School of Environment and Safety Engineering, North University of China, Taiyuan 030051,

Shanxi China

**Supporting information**

Table S1 Lattice parameters of NTO and HMX

|                                           | NTO            | HMX            |
|-------------------------------------------|----------------|----------------|
| Empirical formula                         | $C_2H_2O_3N_4$ | $C_4H_8O_8N_8$ |
| $a(\text{Å})$                             | 9.326          | 6.540          |
| $b(\text{Å})$                             | 5.450          | 11.050         |
| $c(\text{Å})$                             | 9.040          | 8.700          |
| $\alpha(^{\circ})$                        | 90.00          | 90.00          |
| $\beta(^{\circ})$                         | 101.474        | 124.30         |
| $\gamma(^{\circ})$                        | 90.00          | 90.00          |
| $V(\text{Å}^3)$                           | 450.291        | 519.387        |
| Density ( $\text{g}\cdot\text{cm}^{-3}$ ) | 1.919          | 1.894          |

Table S2 Topological parameters of NTO/HMX mixture

| Interaction | $H(r)$    | $\rho(r)$ | $\nabla^2\rho(r)$ |
|-------------|-----------|-----------|-------------------|
| H291...O130 | 0.000953  | 0.00625   | 0.0238            |
| H289...O130 | 0.000680  | 0.00227   | 0.0100            |
| H116...O271 | -0.000589 | 0.0554    | 0.2000            |
| H289...O102 | 0.00102   | 0.00683   | 0.0257            |
| H264...O96  | 0.00112   | 0.0208    | 0.0745            |
| H248...O96  | 0.000766  | 0.00284   | 0.0112            |
| H94...O255  | 0.00155   | 0.0498    | 0.203             |
| H83...O242  | -0.000186 | 0.0512    | 0.183             |
| H236...O58  | 0.000919  | 0.00309   | 0.0134            |
| H50...O185  | -0.00309  | 0.0634    | 0.216             |
| H180...O36  | 0.000970  | 0.0180    | 0.0641            |
| H135...O8   | 0.00112   | 0.0234    | 0.0850            |
| H6...O143   | -0.00209  | 0.0604    | 0.214             |

Note: All topological parameters are in a.u.

Table S3 Primary reactions of NTO/HMX system

| Temperature/K | Reaction time/ps | Frequencies                                     | Reactions                                                           |
|---------------|------------------|-------------------------------------------------|---------------------------------------------------------------------|
| 2500          | 0.10-1.29        | 41                                              | $C_4H_8O_8N_8 \rightarrow C_4H_8O_6N_7 + NO_2$                      |
|               | 0.05-3.15        | 23                                              | $C_2H_2O_3N_4 + C_2H_2O_3N_4 \rightarrow C_2H_3O_3N_4 + C_2HO_3N_4$ |
|               | 0.23-2.61        | 15                                              | $C_4H_8O_4N_6 \rightarrow C_4H_8O_2N_5 + NO_2$                      |
|               | 0.27-9.97        | 12                                              | $HNO_2 \rightarrow OH + NO$                                         |
|               | 0.70-8.75        | 8                                               | $C_2H_2O_3N_4 + NO_2 \rightarrow C_2HO_3N_4 + HNO_2$                |
|               | 0.25-1.85        | 6                                               | $C_4H_9O_6N_7 \rightarrow C_4H_8O_4N_6 + HNO_2$                     |
|               | 0.66-9.72        | 6                                               | $C_2H_2O_3N_4 + OH \rightarrow C_2HO_3N_4 + H_2O$                   |
|               | 1.41-4.97        | 5                                               | $C_2HO_3N_4 + OH \rightarrow C_2O_3N_4 + H_2O$                      |
|               | 0.23-0.55        | 3                                               | $C_2H_2O_3N_4 + C_4H_8O_6N_7 \rightarrow C_2HO_3N_4 + C_4H_9O_6N_7$ |
|               | 0.40-1.70        | 2                                               | $C_4H_9O_8N_8 \rightarrow C_4H_8O_6N_7 + HNO_2$                     |
| 2750          | 0.09-0.82        | 33                                              | $C_4H_8O_8N_8 \rightarrow C_4H_8O_6N_7 + NO_2$                      |
|               | 0.60-9.99        | 29                                              | $HNO_2 \rightarrow OH + NO$                                         |
|               | 0.14-1.11        | 23                                              | $C_4H_8O_6N_7 \rightarrow C_4H_8O_4N_6 + NO_2$                      |
|               | 0.05-1.12        | 21                                              | $C_2H_2O_3N_4 + C_2H_2O_3N_4 \rightarrow C_2H_3O_3N_4 + C_2HO_3N_4$ |
|               | 0.18-1.69        | 15                                              | $C_4H_8O_4N_6 \rightarrow C_4H_8O_2N_5 + NO_2$                      |
|               | 0.47-4.89        | 6                                               | $C_2H_2O_3N_4 + NO_2 \rightarrow C_2HO_3N_4 + HNO_2$                |
|               | 0.31-1.66        | 5                                               | $C_2H_2O_3N_4 + OH \rightarrow C_2HO_3N_4 + H_2O$                   |
|               | 0.12-0.22        | 4                                               | $C_2H_2O_3N_4 + C_4H_8O_8N_8 \rightarrow C_2HO_3N_4 + C_4H_9O_8N_8$ |
|               | 2.27-3.88        | 4                                               | $C_2HON_3 + NO_2 \rightarrow C_2ON_3 + HNO_2$                       |
| 0.37-0.66     | 2                | $C_4H_9O_6N_7 \rightarrow C_4H_8O_4N_6 + HNO_2$ |                                                                     |
| 3000          | 0.25-9.98        | 79                                              | $HNO_2 \rightarrow OH + NO$                                         |
|               | 0.09-0.35        | 34                                              | $C_4H_8O_8N_8 \rightarrow C_4H_8O_6N_7 + NO_2$                      |
|               | 0.05-0.84        | 17                                              | $C_2H_2O_3N_4 + C_2H_2O_3N_4 \rightarrow C_2H_3O_3N_4 + C_2HO_3N_4$ |
|               | 0.40-9.63        | 16                                              | $H + NO_2 \rightarrow HNO_2$                                        |
|               | 0.56-9.60        | 13                                              | $HN_2 + NO_2 \rightarrow HNO_2 + N_2$                               |
|               | 0.07-3.23        | 11                                              | $C_2H_2O_3N_4 \rightarrow C_2HO_3N_4 + H$                           |
|               | 0.29-0.70        | 8                                               | $C_2H_2O_3N_4 + NO_2 \rightarrow C_2HO_3N_4 + HNO_2$                |
|               | 0.04-1.56        | 5                                               | $C_2H_2O_3N_4 + C_2H_2O_3N_4 \rightarrow C_4H_4O_6N_8$              |
|               | 0.32-8.37        | 3                                               | $C_2H_2O_3N_4 + OH \rightarrow C_2HO_3N_4 + H_2O$                   |
|               | 0.12-0.18        | 2                                               | $C_2H_2O_3N_4 + C_4H_8O_8N_8 \rightarrow C_2HO_3N_4 + C_4H_9O_8N_8$ |
| 3250          | 0.25-10.00       | 70                                              | $HNO_2 \rightarrow OH + NO$                                         |
|               | 0.09-0.48        | 33                                              | $C_4H_8O_8N_8 \rightarrow C_4H_8O_6N_7 + NO_2$                      |
|               | 0.12-0.81        | 24                                              | $C_4H_8O_6N_7 \rightarrow C_4H_8O_4N_6 + NO_2$                      |
|               | 0.05-1.05        | 19                                              | $C_2H_2O_3N_4 + C_2H_2O_3N_4 \rightarrow C_2H_3O_3N_4 + C_2HO_3N_4$ |
|               | 0.43-9.57        | 19                                              | $H + NO_2 \rightarrow HNO_2$                                        |
|               | 0.07-3.15        | 11                                              | $C_2H_2O_3N_4 \rightarrow C_2HO_3N_4 + H$                           |
|               | 0.04-0.76        | 9                                               | $C_2H_2O_3N_4 + C_2H_2O_3N_4 \rightarrow C_4H_4O_6N_8$              |
|               | 0.21-0.94        | 7                                               | $C_2H_2O_3N_4 + OH \rightarrow C_2HO_3N_4 + H_2O$                   |
|               | 0.12-0.13        | 2                                               | $C_2H_2O_3N_4 + C_4H_8O_8N_8 \rightarrow C_2HO_3N_4 + C_4H_9O_8N_8$ |
|               | 0.19-1.25        | 2                                               | $C_2H_2O_3N_4 + NO_2 \rightarrow C_2HO_3N_4 + HNO_2$                |

Table S3 (Continued)

| Temperature/K | Reaction time/ps | Frequencies | Reactions |
|---------------|------------------|-------------|-----------|
|---------------|------------------|-------------|-----------|

|           |           |                                                                                                               |                                                                                                                                                                              |
|-----------|-----------|---------------------------------------------------------------------------------------------------------------|------------------------------------------------------------------------------------------------------------------------------------------------------------------------------|
| 3500      | 0.20-9.99 | 64                                                                                                            | $\text{HNO}_2 \rightarrow \text{OH} + \text{NO}$                                                                                                                             |
|           | 0.09-0.21 | 37                                                                                                            | $\text{C}_4\text{H}_8\text{O}_8\text{N}_8 \rightarrow \text{C}_4\text{H}_8\text{O}_6\text{N}_7 + \text{NO}_2$                                                                |
|           | 0.12-0.48 | 22                                                                                                            | $\text{C}_4\text{H}_8\text{O}_6\text{N}_7 \rightarrow \text{C}_4\text{H}_8\text{O}_4\text{N}_6 + \text{NO}_2$                                                                |
|           | 0.05-0.55 | 18                                                                                                            | $\text{C}_2\text{H}_2\text{O}_3\text{N}_4 + \text{C}_2\text{H}_2\text{O}_3\text{N}_4 \rightarrow \text{C}_2\text{H}_3\text{O}_3\text{N}_4 + \text{C}_2\text{HO}_3\text{N}_4$ |
|           | 0.04-0.51 | 13                                                                                                            | $\text{C}_2\text{H}_2\text{O}_3\text{N}_4 + \text{C}_2\text{H}_2\text{O}_3\text{N}_4 \rightarrow \text{C}_4\text{H}_4\text{O}_6\text{N}_8$                                   |
|           | 2.12-7.13 | 8                                                                                                             | $\text{CHON} + \text{NO}_2 \rightarrow \text{CON} + \text{HNO}_2$                                                                                                            |
|           | 0.36-3.08 | 7                                                                                                             | $\text{C}_2\text{H}_2\text{O}_3\text{N}_4 + \text{OH} \rightarrow \text{C}_2\text{HO}_3\text{N}_4 + \text{H}_2\text{O}$                                                      |
|           | 0.18-1.40 | 6                                                                                                             | $\text{C}_2\text{H}_2\text{O}_3\text{N}_4 + \text{NO}_2 \rightarrow \text{C}_2\text{HO}_3\text{N}_4 + \text{HNO}_2$                                                          |
|           | 0.18-0.31 | 3                                                                                                             | $\text{C}_2\text{H}_2\text{O}_3\text{N}_4 + \text{C}_4\text{H}_8\text{O}_4\text{N}_6 \rightarrow \text{C}_2\text{HO}_3\text{N}_4 + \text{C}_4\text{H}_9\text{O}_4\text{N}_6$ |
| 0.28-1.61 | 3         | $\text{C}_2\text{HO}_3\text{N}_4 + \text{OH} \rightarrow \text{C}_2\text{O}_3\text{N}_4 + \text{H}_2\text{O}$ |                                                                                                                                                                              |

Table S4 Reaction between product molecules

| Temperature | Reaction time/ps | Frequencies                                                       | Reactions                                                                            |
|-------------|------------------|-------------------------------------------------------------------|--------------------------------------------------------------------------------------|
| 2500        | 0.40-106.90      | 35                                                                | $\text{HNO}_2 \rightarrow \text{OH} + \text{NO}$                                     |
|             | 1.70-296.65      | 31                                                                | $\text{CON}_2 \rightarrow \text{CO} + \text{N}_2$                                    |
|             | 3.30-165.55      | 23                                                                | $\text{OH} + \text{HNO} \rightarrow \text{H}_2\text{O} + \text{NO}$                  |
|             | 11.90-298.15     | 16                                                                | $\text{H}_2\text{N} + \text{H}_2\text{O} \rightarrow \text{H}_3\text{N} + \text{OH}$ |
|             | 1.80-296.30      | 13                                                                | $\text{CHON} + \text{OH} \rightarrow \text{CON} + \text{H}_2\text{O}$                |
|             | 1.95-124.85      | 11                                                                | $\text{HN}_2 + \text{NO}_2 \rightarrow \text{HNO}_2 + \text{N}_2$                    |
|             | 7.50-297.80      | 10                                                                | $\text{CH}_2\text{O}_2\text{N} \rightarrow \text{CO}_2 + \text{H}_2\text{N}$         |
|             | 7.95-271.45      | 7                                                                 | $\text{CHON} + \text{HN}_2 \rightarrow \text{CON} + \text{H}_2 + \text{N}_2$         |
|             | 22.75-296.55     | 5                                                                 | $\text{CON} + \text{CON}_3 \rightarrow \text{C}_2\text{O}_2\text{N}_2 + \text{N}_2$  |
|             | 9.25-290.15      | 5                                                                 | $\text{CON} + \text{H}_2 \rightarrow \text{CHON} + \text{H}$                         |
| 2750        | 0.60-125.25      | 51                                                                | $\text{HNO}_2 \rightarrow \text{OH} + \text{NO}$                                     |
|             | 1.00-294.20      | 32                                                                | $\text{CON}_2 \rightarrow \text{CO} + \text{N}_2$                                    |
|             | 1.80-274.65      | 27                                                                | $\text{CN}_3 \rightarrow \text{CN} + \text{N}_2$                                     |
|             | 20.75-299.30     | 18                                                                | $\text{H}_2\text{N}_2 \rightarrow \text{H}_2 + \text{N}_2$                           |
|             | 1.05-299.85      | 15                                                                | $\text{HON}_2 \rightarrow \text{OH} + \text{N}_2$                                    |
|             | 3.20-75.25       | 13                                                                | $\text{CHON} + \text{NO} \rightarrow \text{CON} + \text{HNO}$                        |
|             | 3.70-283.95      | 12                                                                | $\text{CON} + \text{HN}_2 \rightarrow \text{CHON} + \text{N}_2$                      |
|             | 0.90-278.50      | 11                                                                | $\text{CHON} + \text{OH} \rightarrow \text{CON} + \text{H}_2\text{O}$                |
|             | 2.65-54.85       | 11                                                                | $\text{OH} + \text{HNO} \rightarrow \text{H}_2\text{O} + \text{NO}$                  |
|             | 2.75-28.75       | 8                                                                 | $\text{CHON} + \text{NO}_2 \rightarrow \text{CON} + \text{HNO}_2$                    |
| 3000        | 0.25-75.10       | 56                                                                | $\text{HNO}_2 \rightarrow \text{OH} + \text{NO}$                                     |
|             | 1.00-300.00      | 38                                                                | $\text{HON}_2 \rightarrow \text{OH} + \text{N}_2$                                    |
|             | 7.25-299.70      | 25                                                                | $\text{C}_2\text{O}_4 \rightarrow \text{CO}_2 + \text{CO}_2$                         |
|             | 4.15-299.00      | 24                                                                | $\text{CHO}_2\text{N}_2 \rightarrow \text{CO}_2 + \text{HN}_2$                       |
|             | 1.05-24.90       | 12                                                                | $\text{CHON} + \text{NO}_2 \rightarrow \text{CON} + \text{HNO}_2$                    |
|             | 2.00-291.85      | 11                                                                | $\text{CHON} + \text{H}_2\text{N} \rightarrow \text{CON} + \text{H}_3\text{N}$       |
| 0.60-60.95  | 10               | $\text{HN}_2 + \text{NO}_2 \rightarrow \text{HNO}_2 + \text{N}_2$ |                                                                                      |

Table S4 (Continued)

| Temperature | Reaction time/ps | Frequencies | Reactions |
|-------------|------------------|-------------|-----------|
|-------------|------------------|-------------|-----------|

| e           |              |                                                   |                                                                                       |
|-------------|--------------|---------------------------------------------------|---------------------------------------------------------------------------------------|
| 3000        | 1.50-299.70  | 10                                                | $\text{CHO}_2 + \text{N}_2 \rightarrow \text{CO}_2 + \text{HN}_2$                     |
|             | 2.20-39.35   | 8                                                 | $\text{H}_2\text{O}_2\text{N} \rightarrow \text{H}_2\text{O} + \text{NO}$             |
|             | 90.95-295.95 | 8                                                 | $\text{HN}_2 + \text{HN}_2 \rightarrow \text{H}_2 + 2\text{N}_2$                      |
| 3250        | 2.50-299.45  | 41                                                | $\text{CON}_2 \rightarrow \text{CO} + \text{N}_2$                                     |
|             | 7.40-299.70  | 40                                                | $\text{C}_2\text{O}_4 \rightarrow \text{CO}_2 + \text{CO}_2$                          |
|             | 0.50-202.80  | 37                                                | $\text{HNO}_2 \rightarrow \text{OH} + \text{NO}$                                      |
|             | 1.30-300.00  | 31                                                | $\text{CO}_2\text{N}_2 \rightarrow \text{CO}_2 + \text{N}_2$                          |
|             | 3.60-297.25  | 18                                                | $\text{CO} + \text{OH} \rightarrow \text{CO}_2 + \text{H}$                            |
|             | 1.00-299.25  | 16                                                | $\text{CHON}_3 \rightarrow \text{CHON} + \text{N}_2$                                  |
|             | 0.65-300.00  | 15                                                | $\text{HON}_2 \rightarrow \text{OH} + \text{N}_2$                                     |
|             | 5.60-298.70  | 14                                                | $\text{H}_2\text{N}_2 \rightarrow \text{H}_2 + \text{N}_2$                            |
|             | 2.95-290.65  | 14                                                | $\text{CON} + \text{HN}_2 \rightarrow \text{CHON} + \text{N}_2$                       |
|             | 1.75-298.90  | 11                                                | $\text{CON} + \text{H}_2\text{O} \rightarrow \text{CHON} + \text{OH}$                 |
| 3500        | 1.10-300.00  | 61                                                | $\text{CO}_2\text{N}_2 \rightarrow \text{CO}_2 + \text{N}_2$                          |
|             | 0.80-300.00  | 56                                                | $\text{HON}_2 \rightarrow \text{OH} + \text{N}_2$                                     |
|             | 6.05-299.60  | 51                                                | $\text{H}_2\text{O} + \text{HN}_2 \rightarrow \text{H}_2 + \text{OH} + \text{N}_2$    |
|             | 0.75-299.95  | 35                                                | $\text{H} + \text{OH} \rightarrow \text{H}_2\text{O}$                                 |
|             | 0.25-215.60  | 31                                                | $\text{HNO}_2 \rightarrow \text{OH} + \text{NO}$                                      |
|             | 3.95-299.40  | 22                                                | $\text{HN}_2 + \text{OH} \rightarrow \text{H}_2\text{O} + \text{N}_2$                 |
|             | 5.35-290.85  | 21                                                | $\text{HN}_2 + \text{HON}_2 \rightarrow \text{H}_2\text{O} + \text{N}_2 + \text{N}_2$ |
|             | 1.35-296.80  | 10                                                | $\text{OH} + \text{HNO} \rightarrow \text{H}_2\text{O} + \text{NO}$                   |
|             | 0.70-7.35    | 9                                                 | $\text{HNO}_2 + \text{NO} \rightarrow \text{HNO} + \text{NO}_2$                       |
| 1.10-300.00 | 6            | $\text{CON}_2 \rightarrow \text{CO} + \text{N}_2$ |                                                                                       |

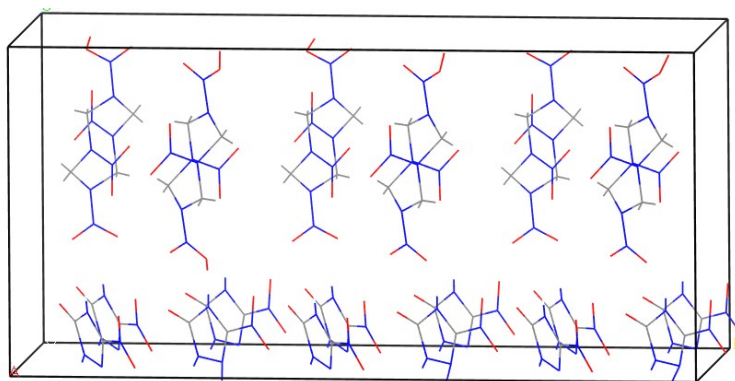

Fig. S1 The initial layer model of CP2K

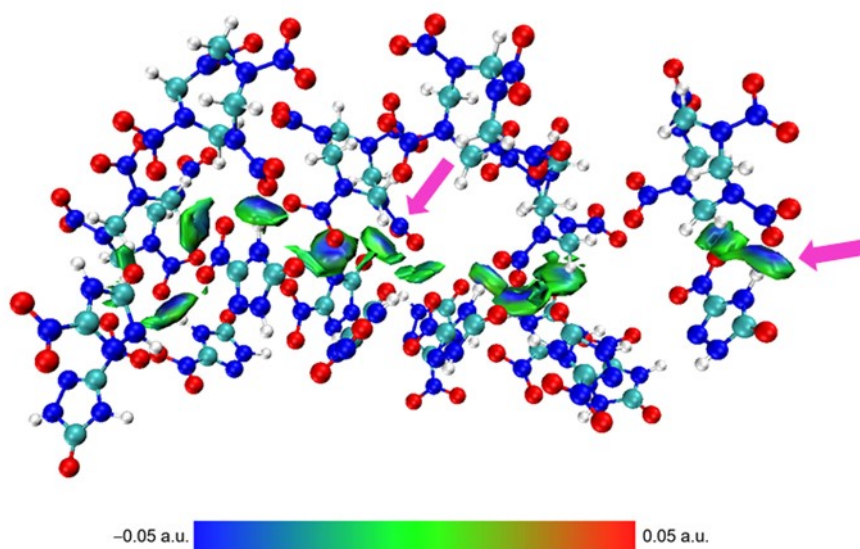

Fig. S2 IGMH analysis diagram of NTO/HMX mixture

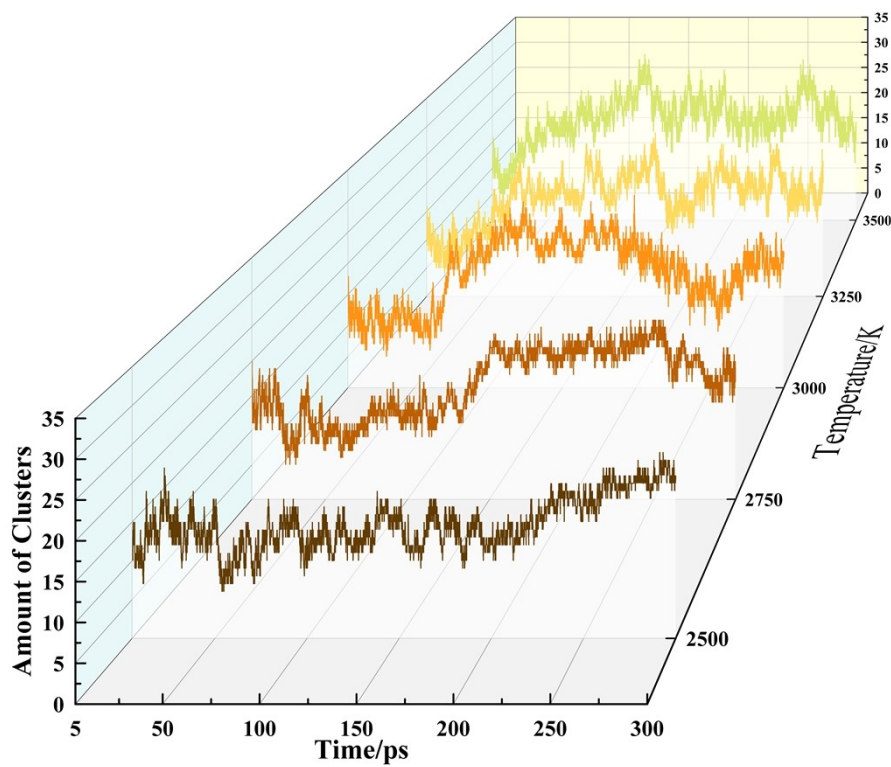

Fig. S3 Trends of the total amount of clusters at different temperatures

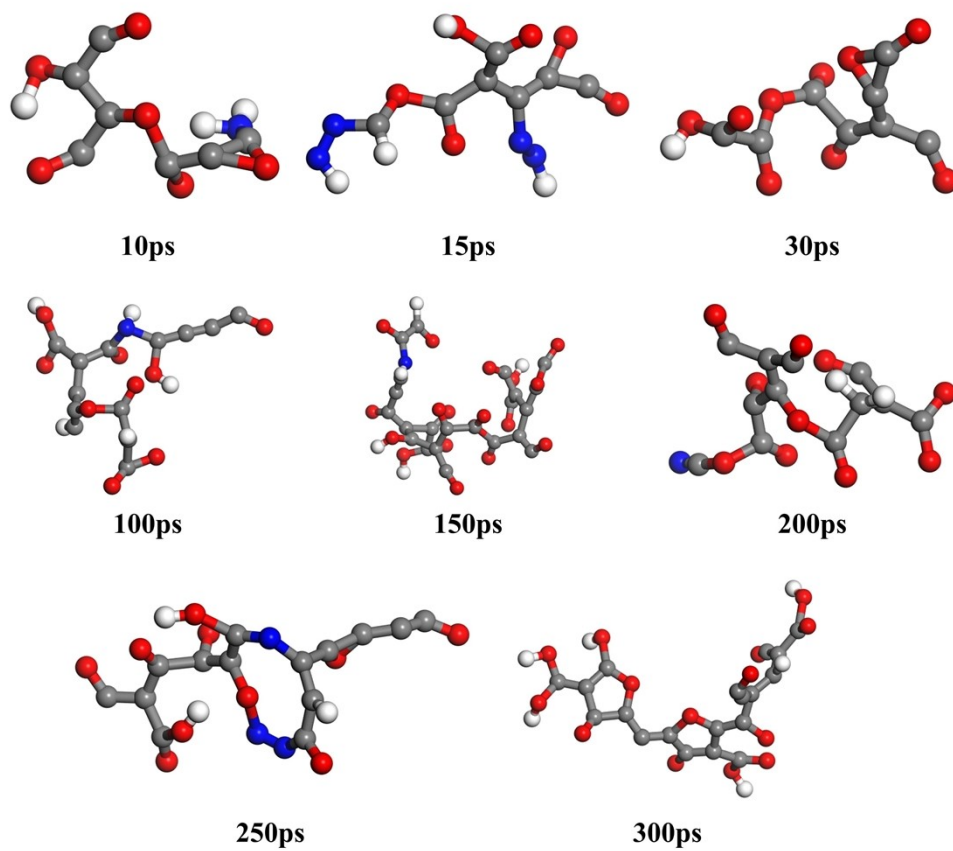

Fig. S4 Maximum cluster structure at different times at 3500 K
